# Supplementary material for: Establishing a Provenance Framework for Sandstones in the Greenland–Norway Rift from the Composition of Moraine/Outwash Sediments
Source: MDPI journal article supplement (doi:10.3390/geosciences12020073), 2022-02-04

Sample L1102

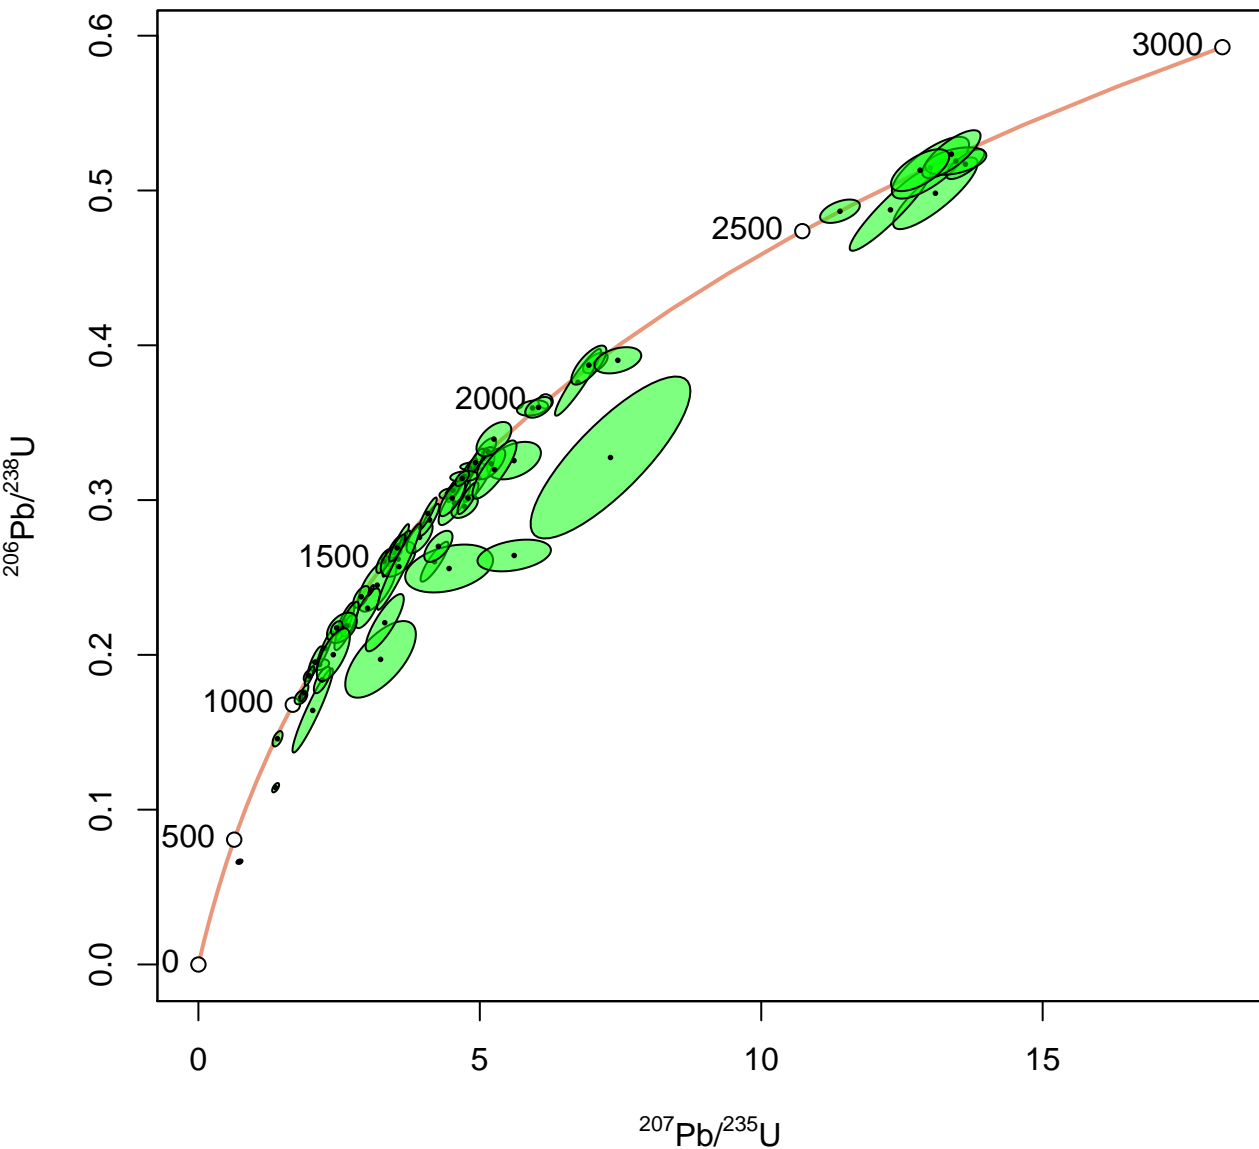

Sample L1105

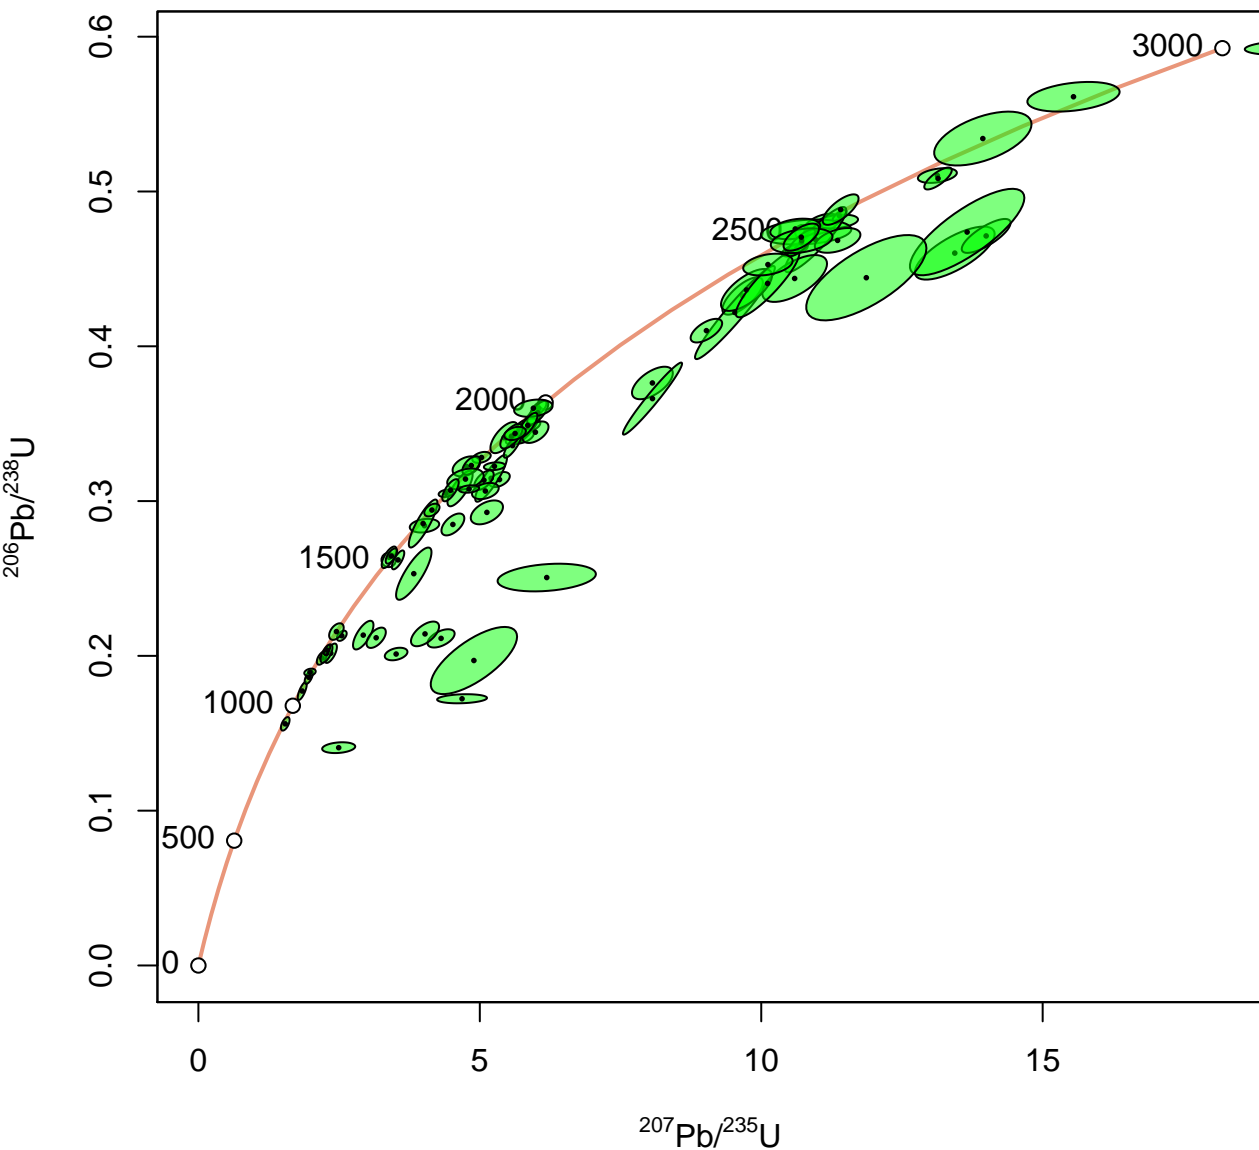

Sample M6000

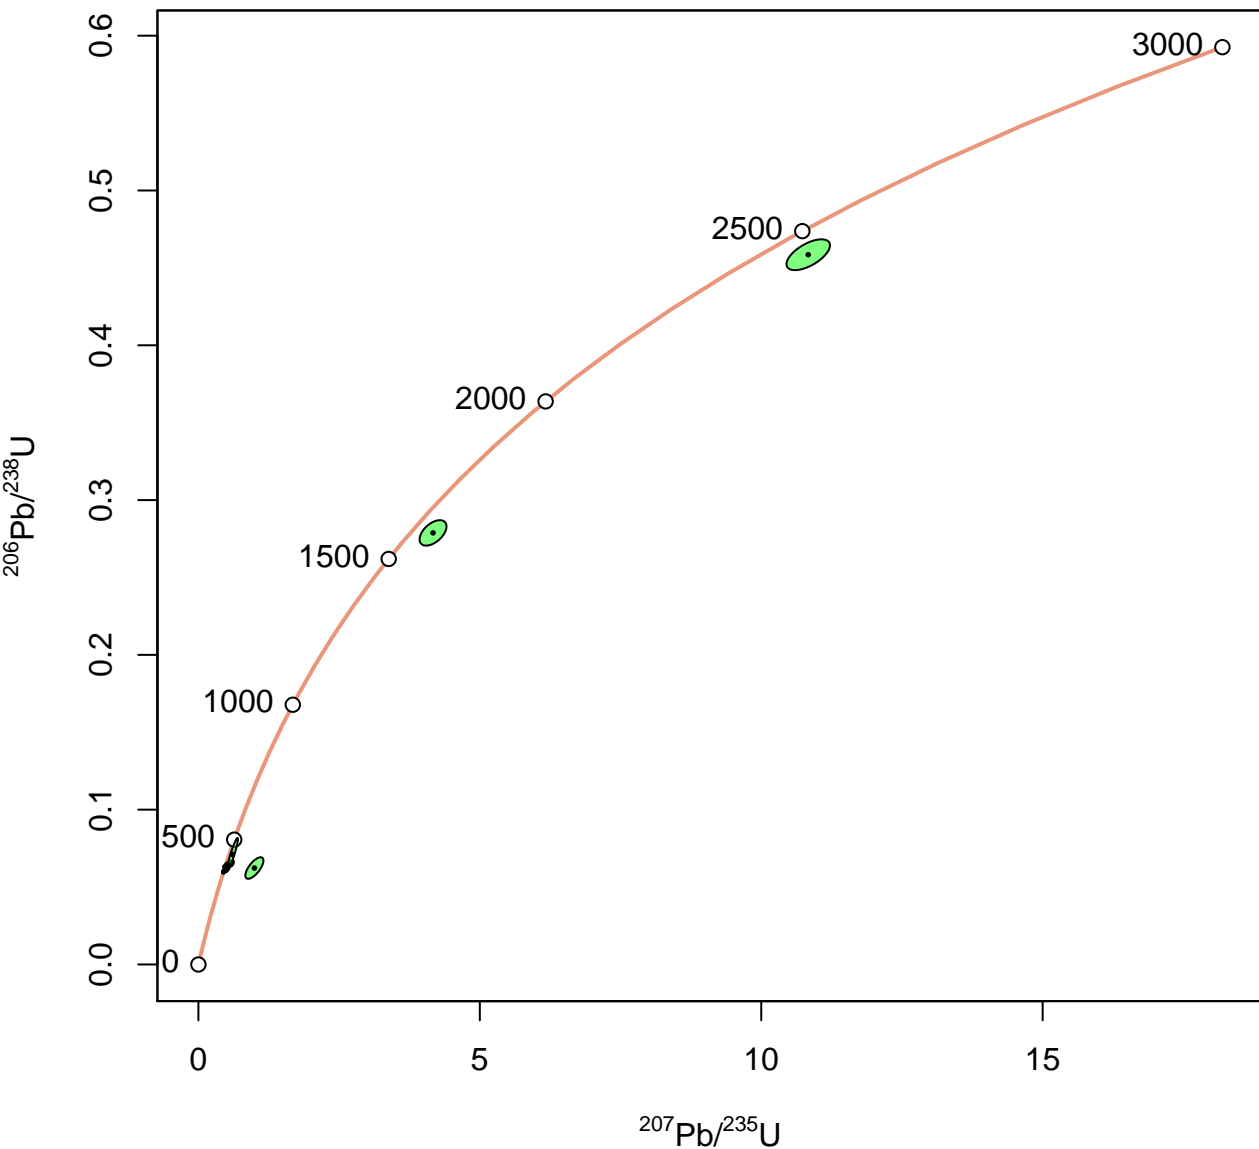

Sample M6002

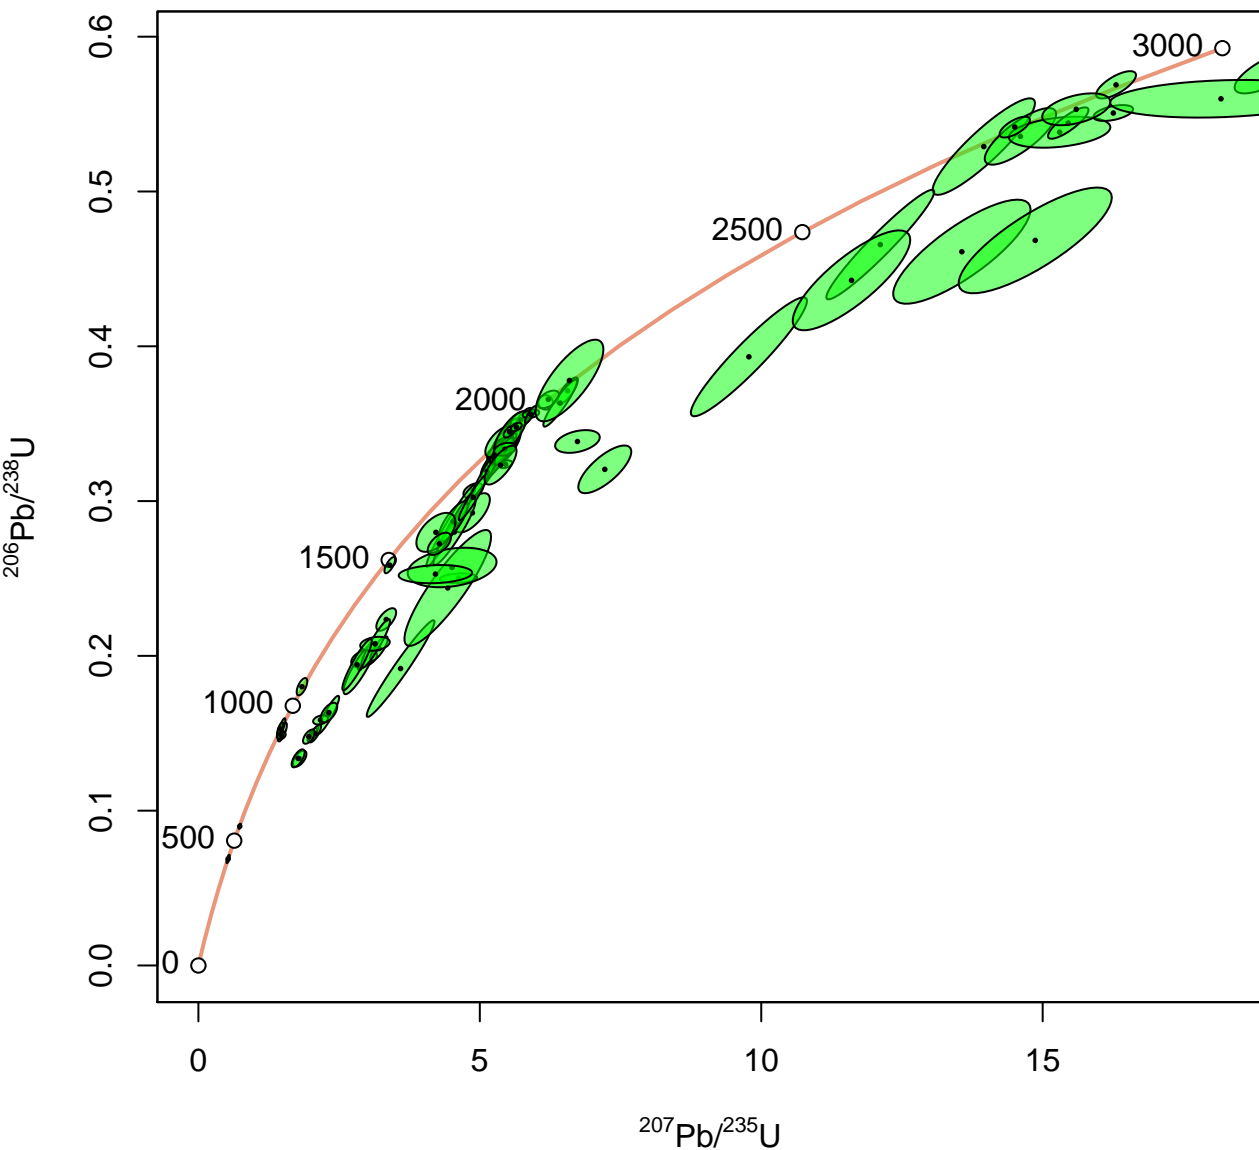

Sample M6006

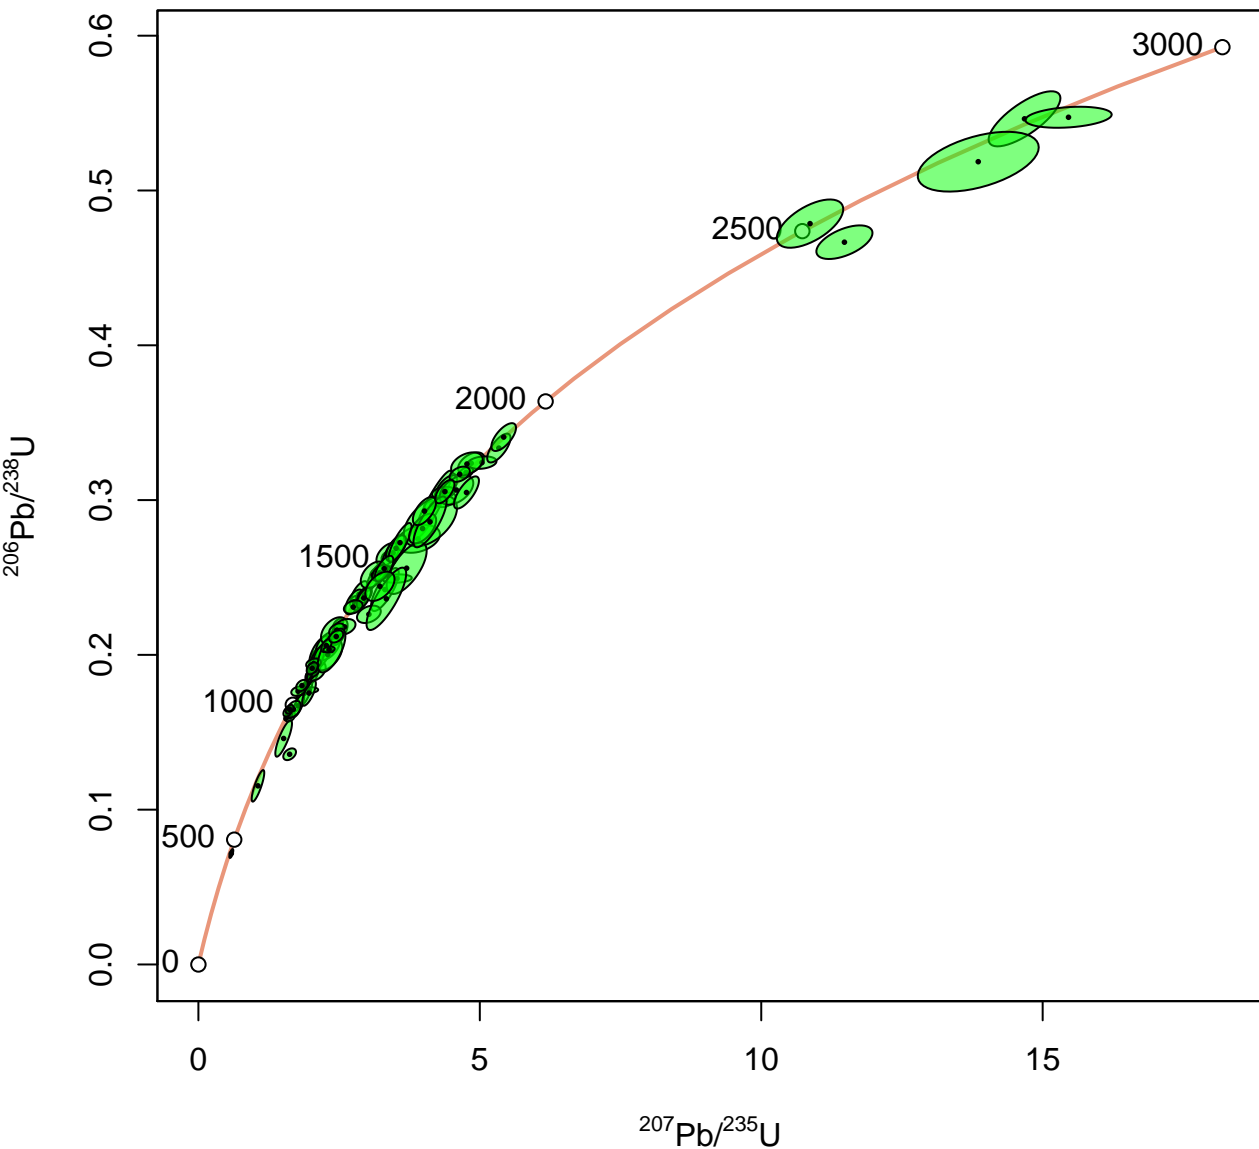

Sample M6007

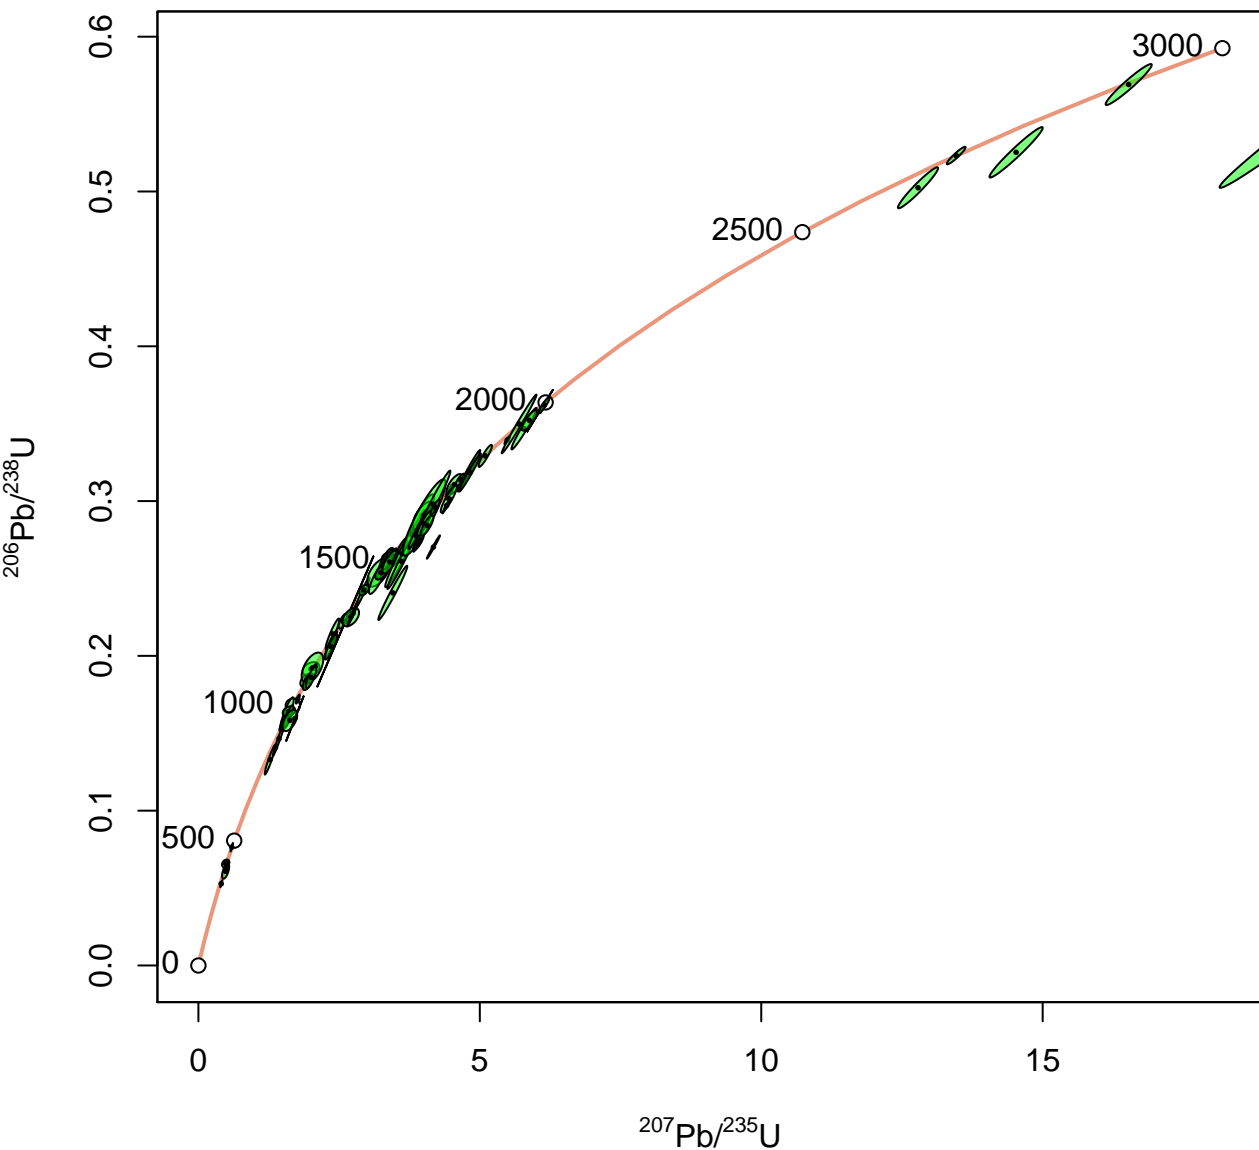

Sample M6011

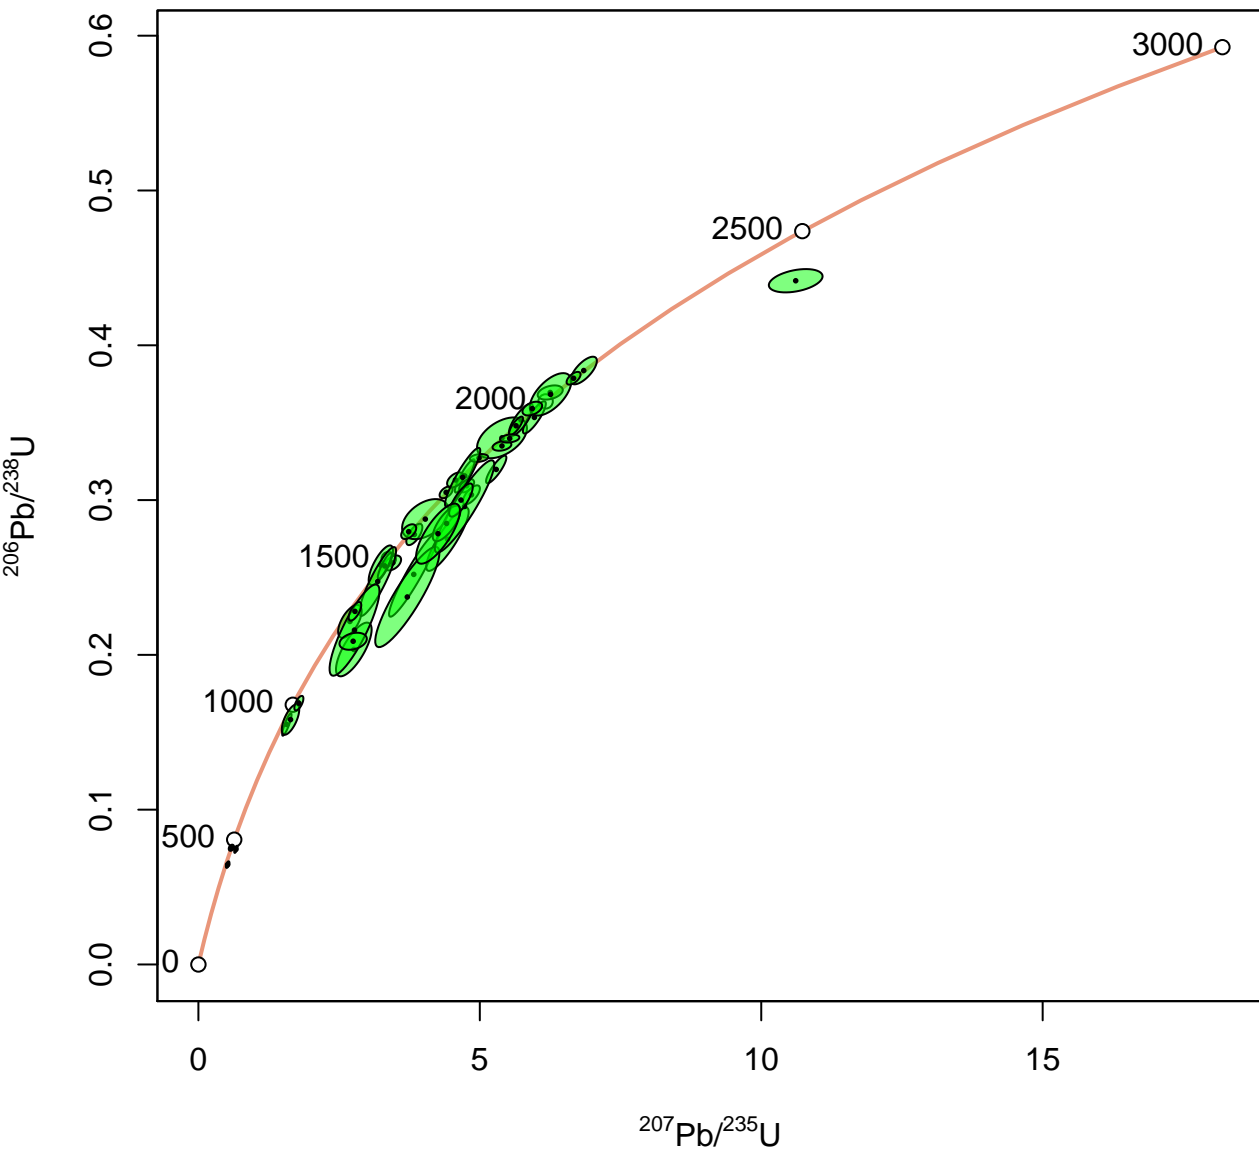

Sample M6012

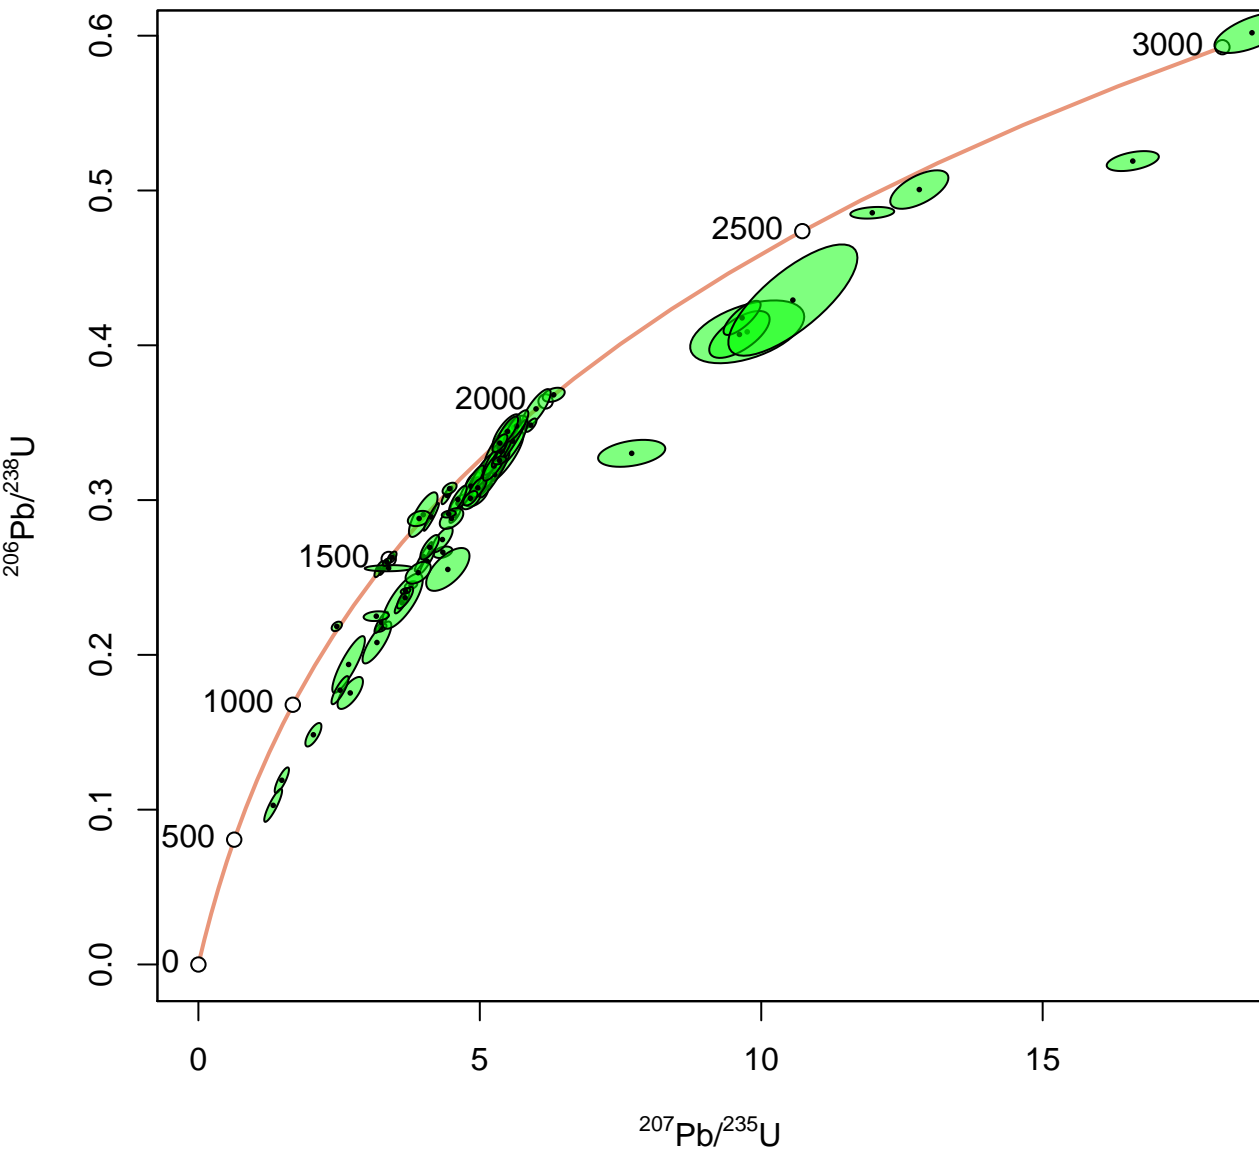



Sample M6014

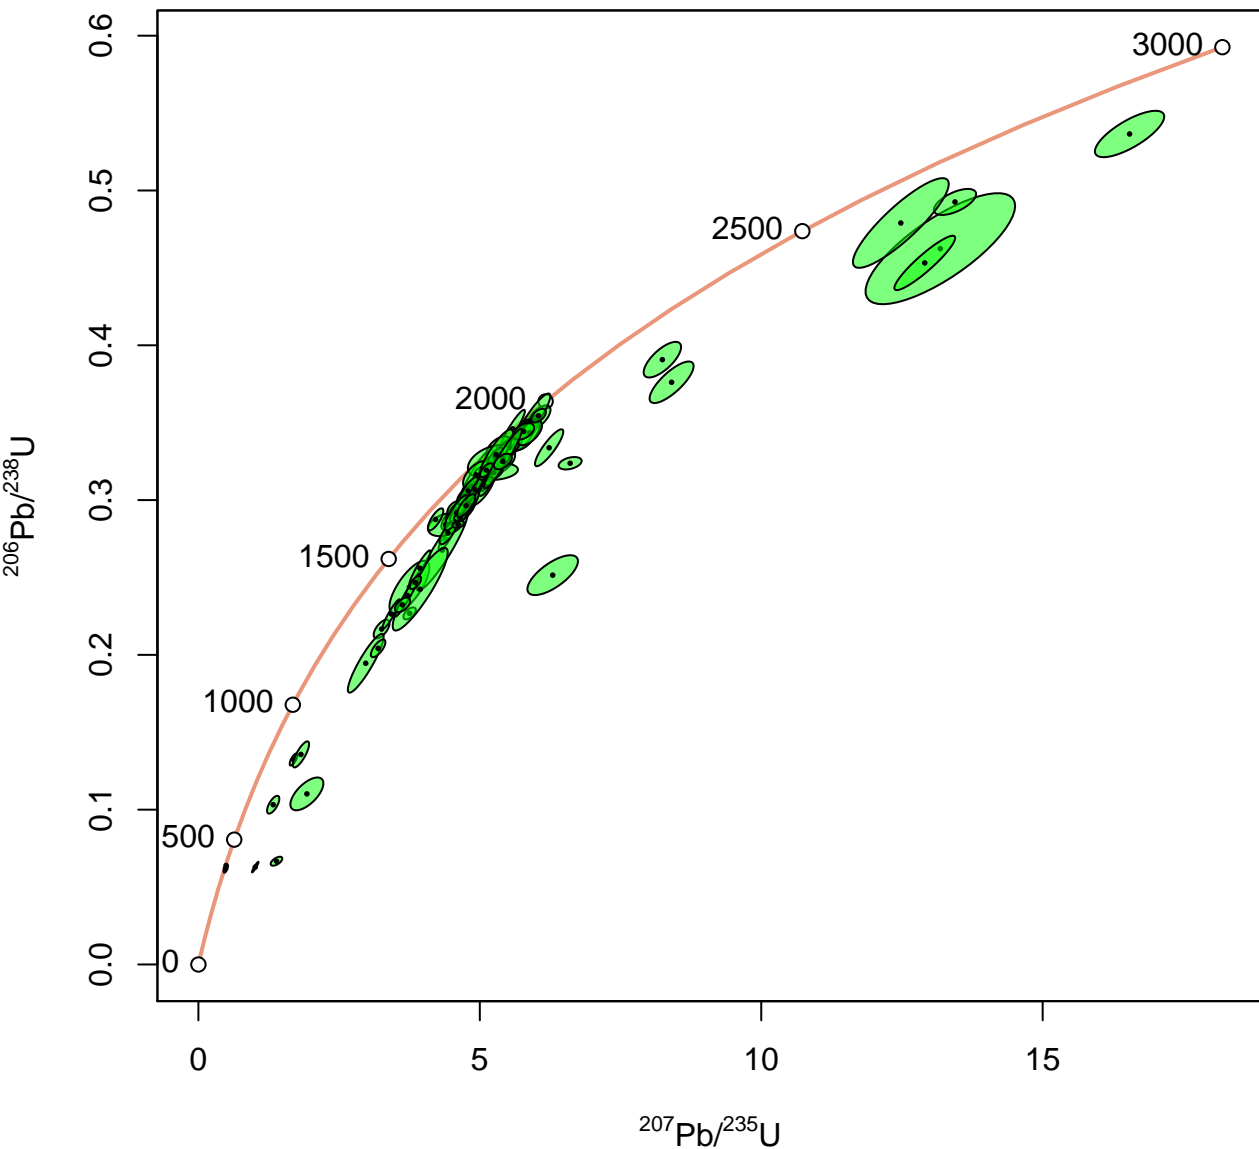

Sample M6016

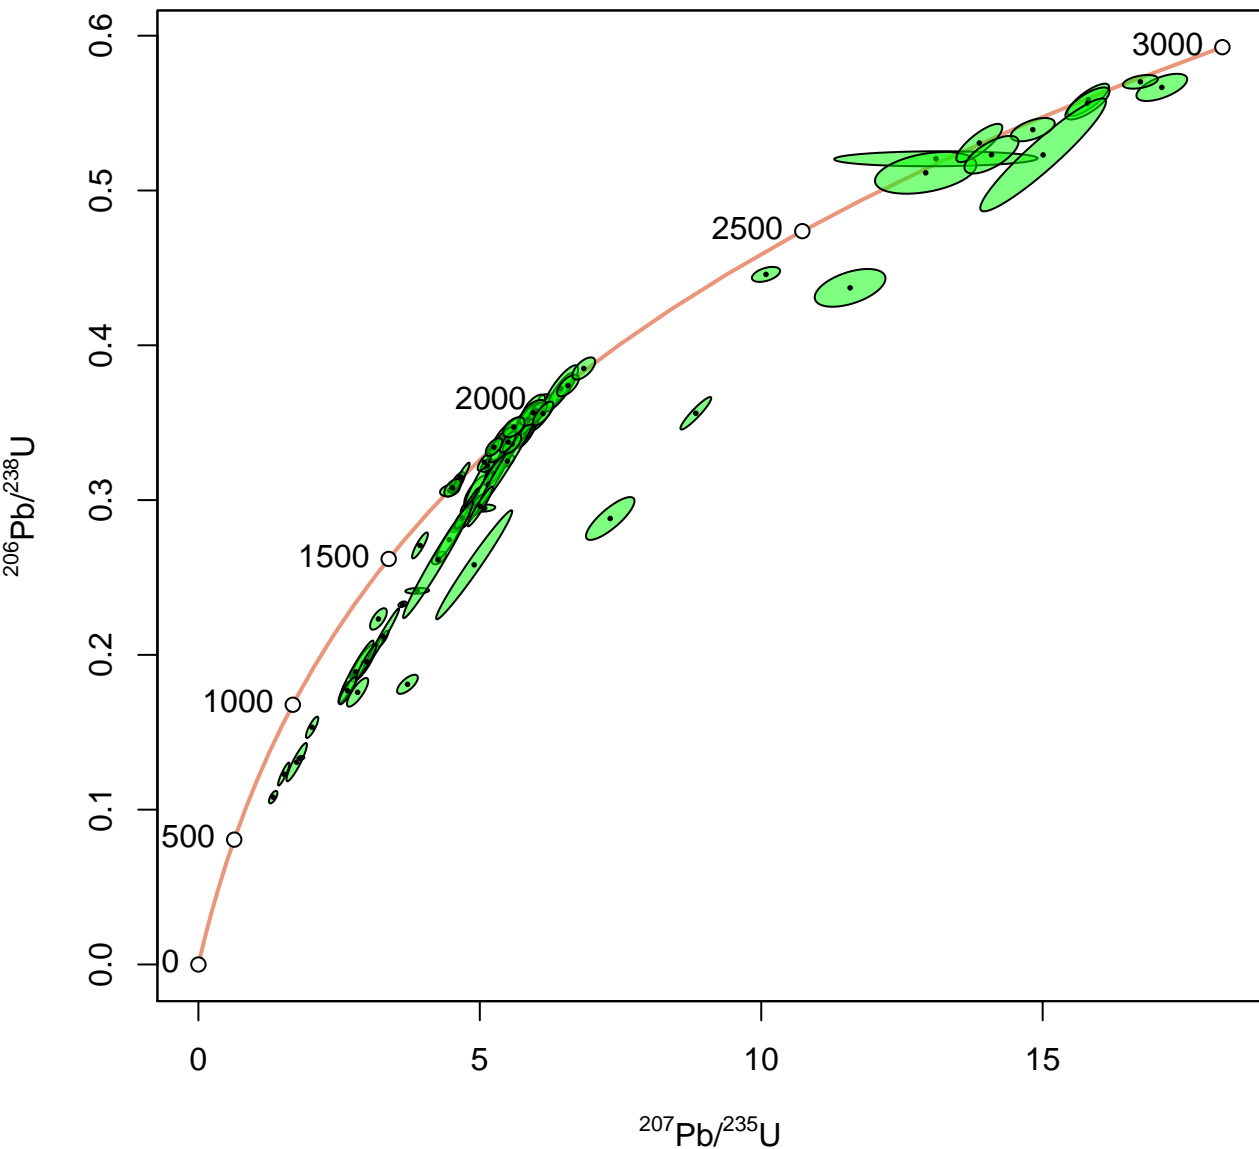

Sample M6018

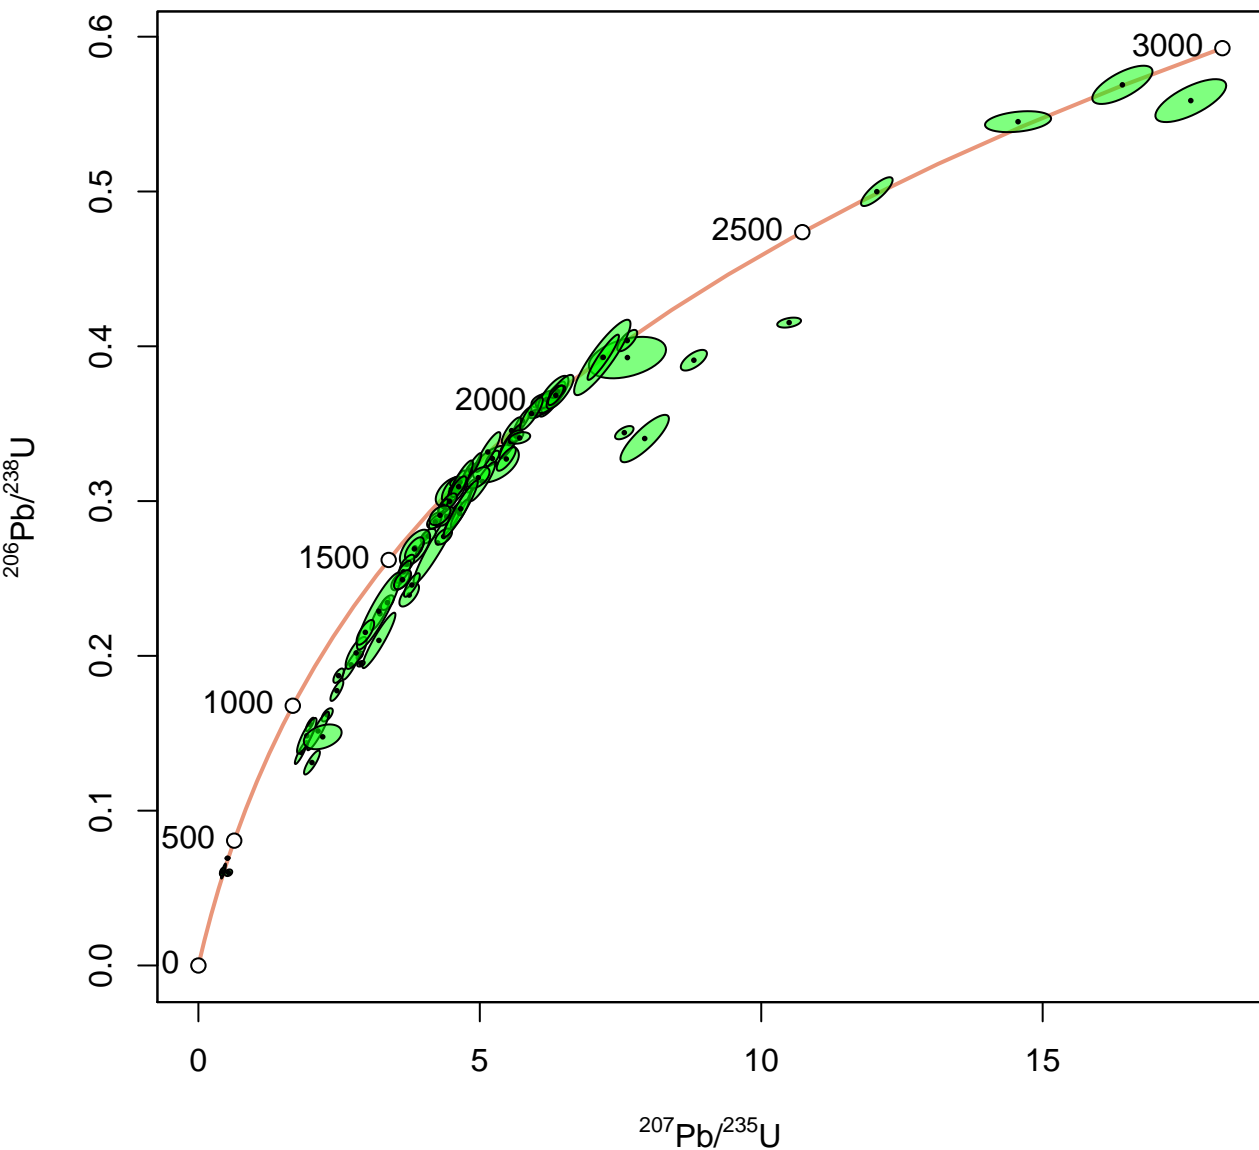

Sample S5262

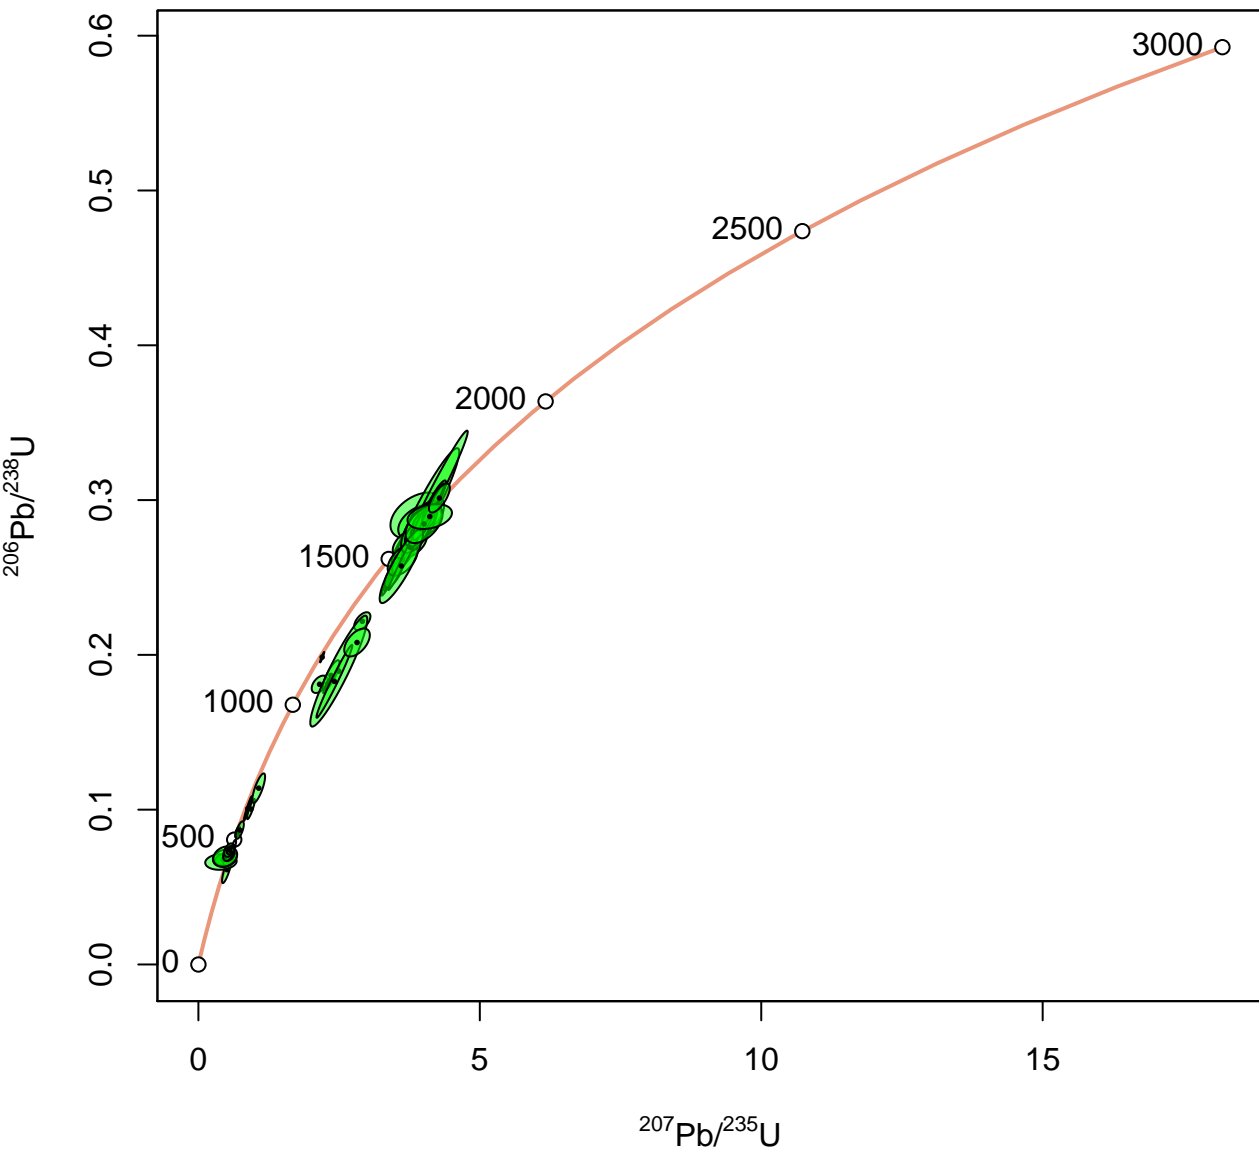

Sample S5264

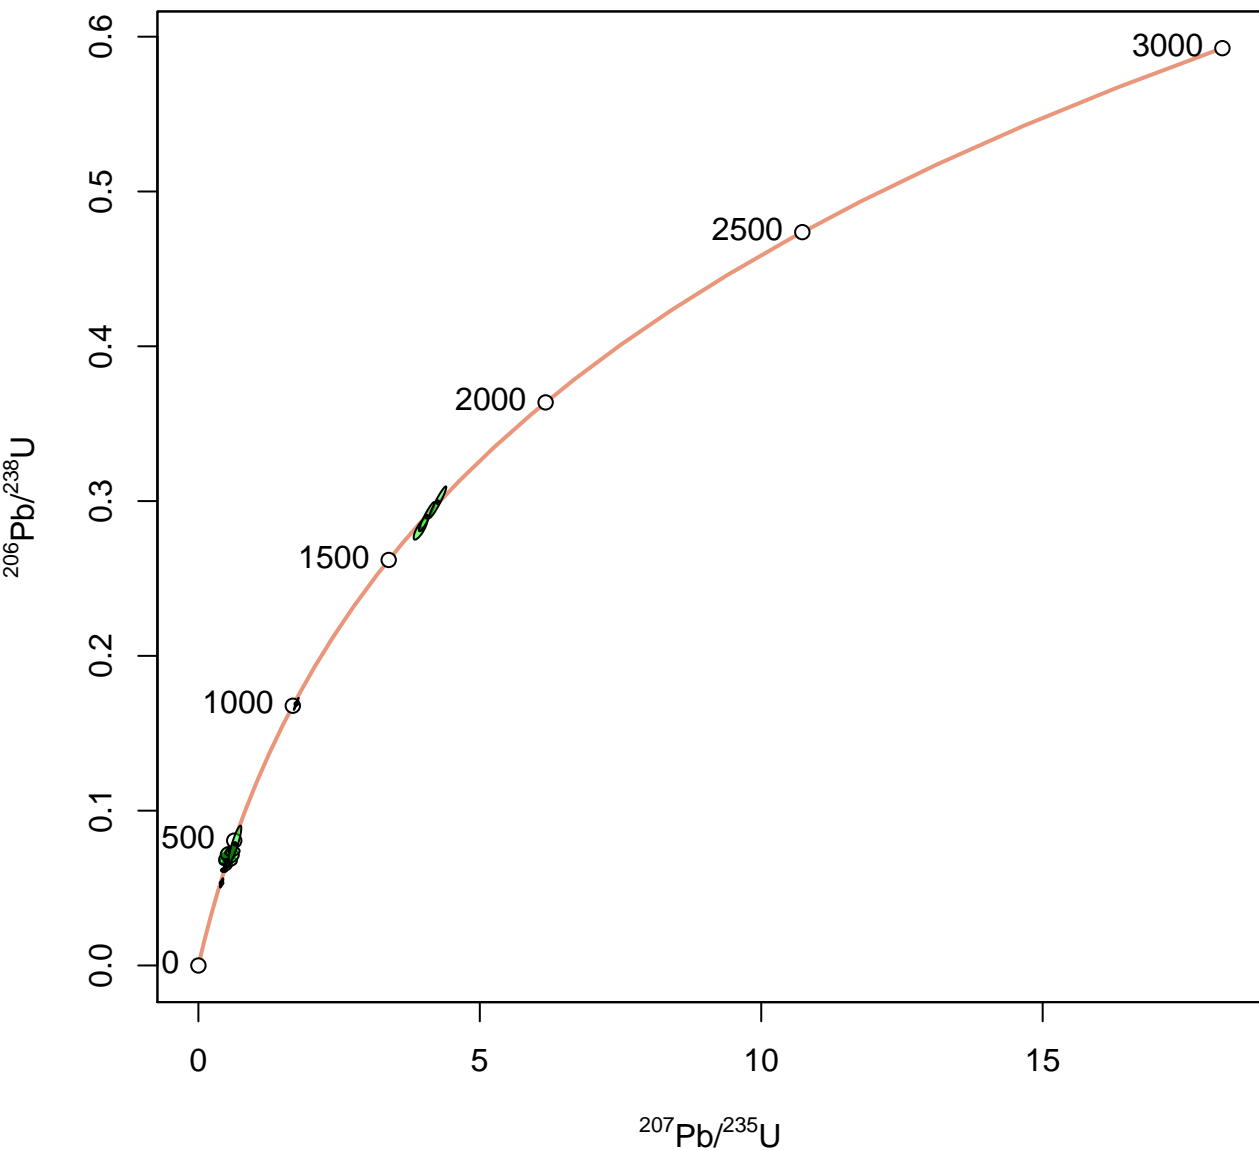

Sample SW5212

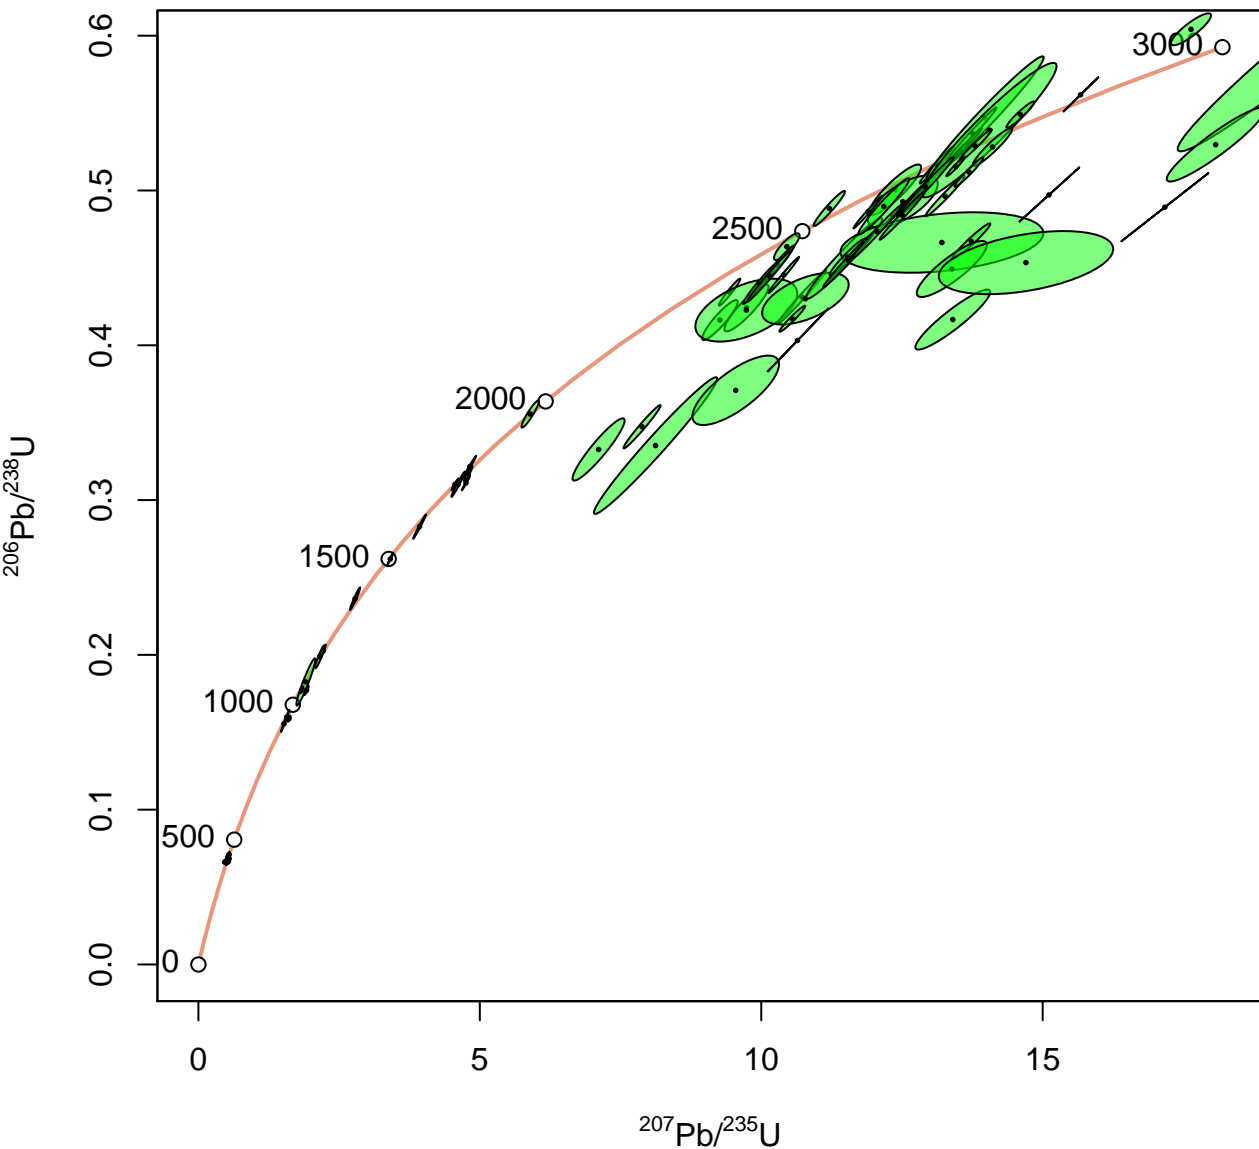

Sample SW5241

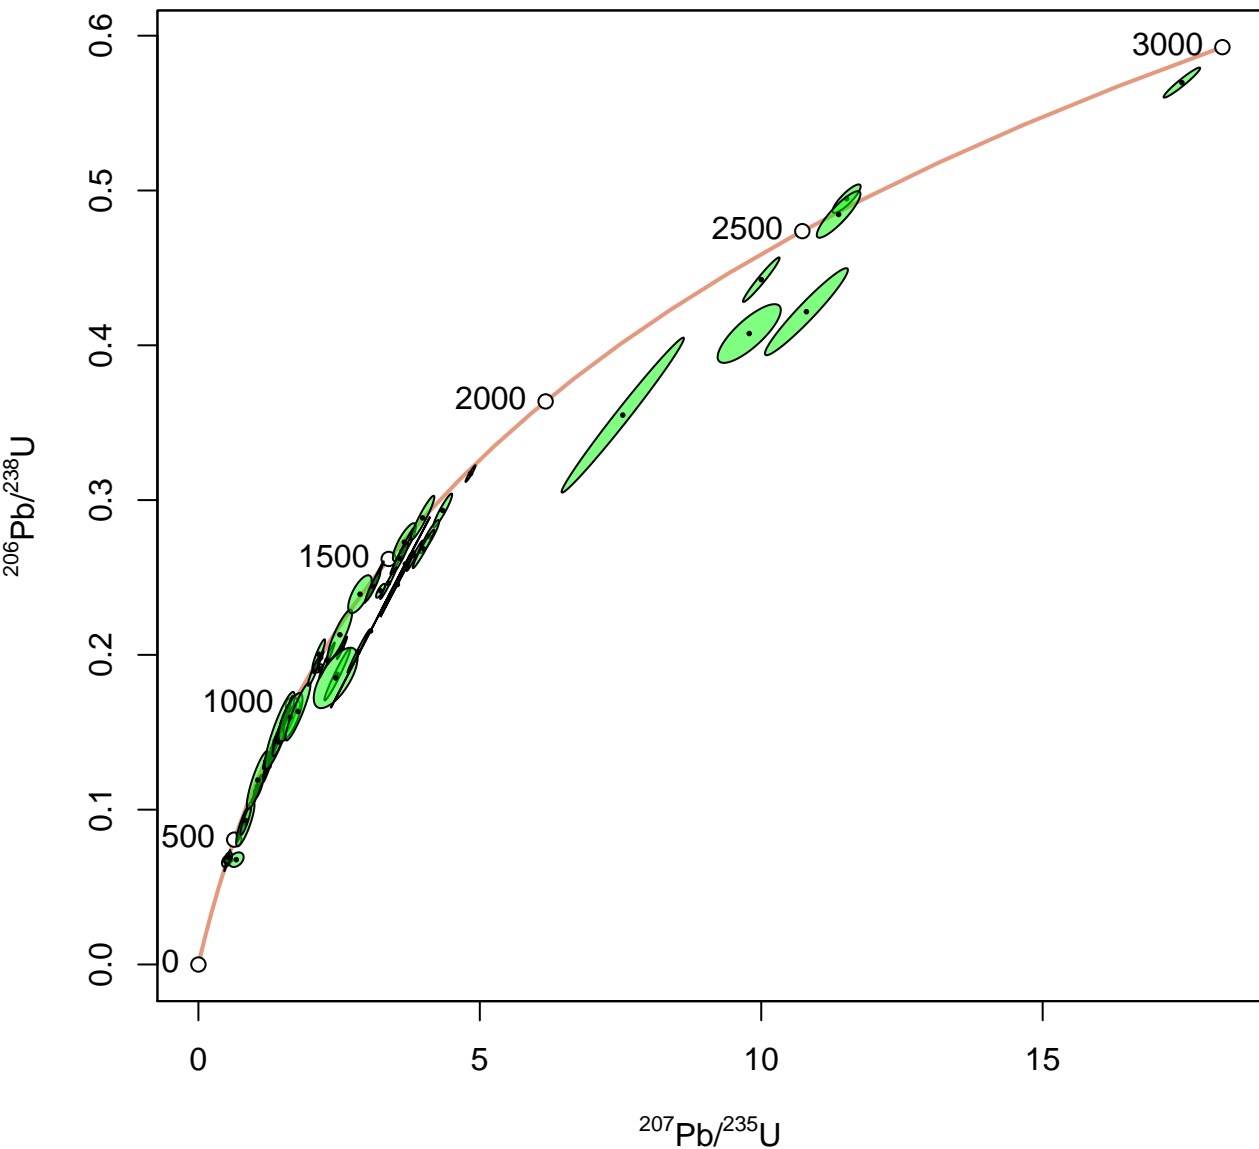

Sample SW5250

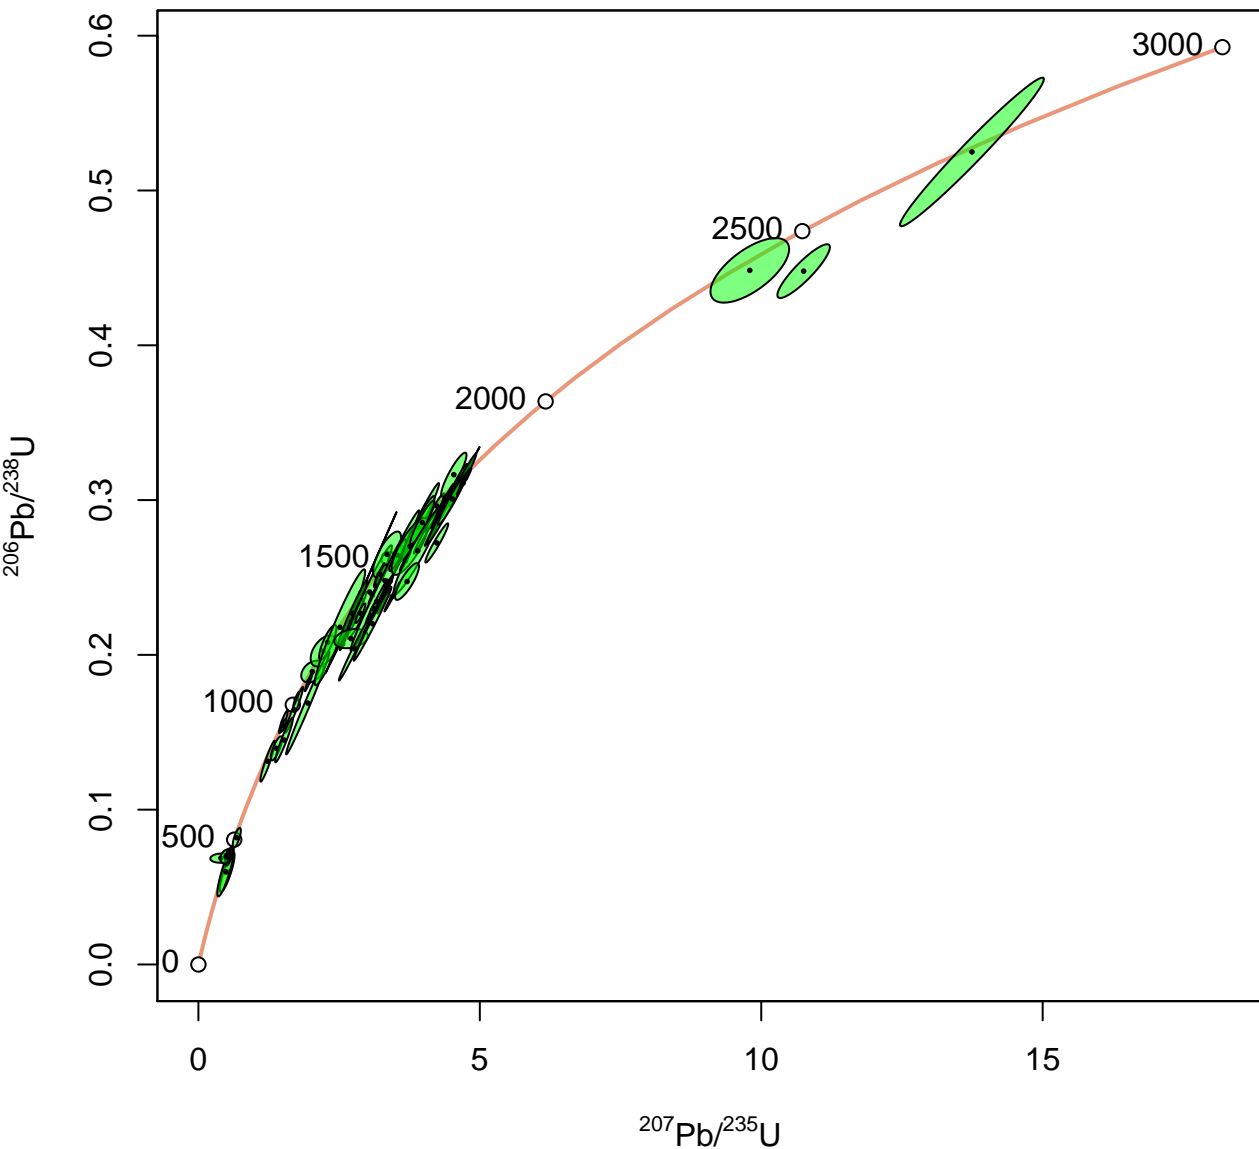

Supplement: s1 [file s1]
