# Supplementary material for: Establishing a Provenance Framework for Sandstones in the Greenland–Norway Rift from the Composition of Moraine/Outwash Sediments
Source: MDPI journal article supplement (doi:10.3390/geosciences12020073), 2022-02-04
Supplement: s1 [file s1]

Detrital amphibole ages in moraine/outwash samples from East Greenland, determined by the  $^{40}\text{Ar}$ - $^{39}\text{Ar}$  method

| sample name | Ca/K | Cl/K | Mol $^{39}\text{Ar}$ ( $\times 10^{-14}$ ) | % $^{40}\text{Ar}^*$ | Age (Ma) | $\pm$ Age |
|-------------|------|------|--------------------------------------------|----------------------|----------|-----------|
| L1102       | 19.1 | 0.0  | 0.007                                      | 69.5                 | 279      | 13        |
| L1102       | 8.8  | 0.4  | 0.033                                      | 98.5                 | 454      | 14        |
| L1102       | 46.2 | 0.2  | 0.014                                      | 77.5                 | 678      | 15        |
| L1102       | 0.3  | 0.0  | 0.055                                      | 98.1                 | 740      | 15        |
| L1102       | 39.1 | 0.2  | 0.023                                      | 97.0                 | 831      | 15        |
| L1102       | 30.2 | 1.6  | 0.021                                      | 98.5                 | 1490     | 20        |
| L1102       | 19.9 | 0.3  | 0.023                                      | 98.6                 | 1660     | 21        |
| L1105       | 6.4  | 0.4  | 0.231                                      | 98.9                 | 369      | 14        |
| L1105       | 5.9  | 0.5  | 0.102                                      | 99.2                 | 378      | 14        |
| L1105       | 8.0  | 0.4  | 0.091                                      | 95.6                 | 398      | 14        |
| L1105       | 10.5 | 0.2  | 0.014                                      | 100.2                | 440      | 14        |
| L1105       | 6.8  | 0.0  | 0.125                                      | 96.4                 | 443      | 14        |
| L1105       | 6.2  | 0.2  | 0.077                                      | 98.1                 | 446      | 14        |
| L1105       | 5.7  | 0.0  | 0.109                                      | 93.1                 | 447      | 14        |
| L1105       | 8.9  | 0.0  | 0.133                                      | 96.3                 | 466      | 14        |
| L1105       | 11.4 | 0.2  | 0.022                                      | 102.2                | 476      | 14        |
| L1105       | 7.6  | 0.3  | 0.107                                      | 97.8                 | 518      | 14        |
| L1105       | 11.1 | 0.0  | 0.073                                      | 94.3                 | 549      | 14        |
| L1105       | 12.5 | 0.0  | 0.063                                      | 97.1                 | 589      | 14        |
| L1105       | 19.6 | 0.2  | 0.106                                      | 95.9                 | 607      | 14        |
| L1105       | 11.2 | 0.0  | 0.072                                      | 87.0                 | 662      | 15        |
| L1105       | 12.0 | 0.2  | 0.072                                      | 98.5                 | 734      | 15        |
| L1105       | 14.8 | 0.2  | 0.068                                      | 98.2                 | 739      | 15        |
| L1105       | 9.7  | 0.2  | 0.072                                      | 92.7                 | 768      | 15        |
| L1105       | 14.5 | 0.0  | 0.070                                      | 98.1                 | 778      | 15        |
| L1105       | 9.5  | 0.3  | 0.065                                      | 97.5                 | 820      | 15        |
| L1105       | 8.5  | 0.4  | 0.082                                      | 98.0                 | 889      | 16        |
| L1105       | 9.7  | 0.0  | 0.074                                      | 93.1                 | 1032     | 17        |
| L1105       | 21.3 | 0.3  | 0.060                                      | 98.1                 | 1434     | 19        |
| L1105       | 19.2 | 0.0  | 0.027                                      | 86.2                 | 1840     | 23        |
| L1105       | 15.5 | 0.0  | 0.003                                      | 85.8                 | 3323     | 36        |
| M6000       | 2.1  | 0.0  | 0.322                                      | 98.0                 | 425      | 14        |
| M6000       | 5.5  | 0.0  | 0.153                                      | 90.2                 | 426      | 14        |
| M6000       | 8.9  | 0.0  | 0.201                                      | 99.4                 | 430      | 14        |
| M6000       | 6.3  | 0.0  | 0.161                                      | 97.4                 | 433      | 14        |
| M6000       | 14.8 | 0.0  | 0.203                                      | 99.2                 | 435      | 14        |
| M6000       | 3.6  | 0.0  | 0.356                                      | 98.9                 | 436      | 14        |
| M6000       | 3.4  | 0.0  | 0.633                                      | 98.4                 | 437      | 14        |
| M6000       | 22.4 | 0.0  | 0.117                                      | 97.9                 | 439      | 14        |
| M6000       | 13.5 | 0.0  | 0.098                                      | 20.3                 | 442      | 14        |
| M6000       | 3.4  | 0.0  | 0.158                                      | 98.3                 | 445      | 14        |
| M6000       | 3.7  | 0.0  | 0.423                                      | 98.7                 | 445      | 14        |
| M6000       | 11.3 | 0.0  | 0.103                                      | 74.0                 | 445      | 14        |
| M6000       | 5.7  | 0.0  | 0.208                                      | 96.3                 | 446      | 14        |
| M6000       | 7.7  | 0.0  | 0.141                                      | 101.5                | 469      | 14        |

| sample name | Ca/K  | Cl/K | Mol <sup>39</sup> Ar (x10 <sup>-14</sup> ) | % <sup>40</sup> Ar* | Age (Ma) | ± Age |
|-------------|-------|------|--------------------------------------------|---------------------|----------|-------|
| M6000       | 7.6   | 0.0  | 0.282                                      | 98.9                | 475      | 14    |
| M6000       | 9.4   | 0.0  | 0.168                                      | 94.5                | 476      | 14    |
| M6000       | 7.6   | 0.0  | 0.128                                      | 95.4                | 506      | 14    |
| M6000       | 2.6   | 0.0  | 0.147                                      | 97.5                | 507      | 14    |
| M6000       | 6.4   | 0.0  | 0.239                                      | 96.0                | 522      | 14    |
| M6000       | 8.5   | 0.0  | 0.099                                      | 98.2                | 522      | 14    |
| M6000       | 16.4  | 0.0  | 0.049                                      | 52.9                | 561      | 14    |
| M6000       | 0.7   | 0.0  | 0.425                                      | 99.6                | 577      | 14    |
| M6000       | 2.5   | 0.0  | 0.217                                      | 98.6                | 605      | 14    |
| M6000       | 3.5   | 0.0  | 0.285                                      | 96.7                | 683      | 15    |
| M6000       | 5.9   | 0.0  | 0.419                                      | 99.2                | 814      | 15    |
| M6000       | 6.2   | 0.0  | 0.347                                      | 98.6                | 984      | 16    |
| M6000       | 7.8   | 0.0  | 0.163                                      | 98.3                | 989      | 16    |
| M6000       | 15.4  | 0.0  | 0.148                                      | 98.6                | 2132     | 25    |
| M6002       | 29.2  | 0.0  | 0.014                                      | 62.0                | 349      | 13    |
| M6002       | 29.7  | 0.0  | 0.018                                      | 68.1                | 382      | 14    |
| M6002       | 24.9  | 0.0  | 0.021                                      | 82.8                | 389      | 14    |
| M6002       | 30.6  | 0.0  | 0.013                                      | 79.8                | 393      | 14    |
| M6002       | 14.3  | 0.0  | 0.019                                      | 86.7                | 395      | 14    |
| M6002       | 3.0   | 0.1  | 0.021                                      | 86.7                | 398      | 14    |
| M6002       | 147.8 | 0.0  | 0.016                                      | 86.3                | 417      | 14    |
| M6002       | 14.7  | 0.0  | 0.046                                      | 94.5                | 418      | 14    |
| M6002       | 53.3  | 0.0  | 0.038                                      | 98.3                | 420      | 14    |
| M6002       | 34.9  | 0.0  | 0.036                                      | 94.8                | 425      | 14    |
| M6002       | 33.8  | 0.0  | 0.112                                      | 81.7                | 448      | 14    |
| M6002       | 17.0  | 0.0  | 0.056                                      | 96.2                | 490      | 14    |
| M6002       | 31.4  | -0.1 | 0.011                                      | 174.8               | 633      | 14    |
| M6002       | 15.0  | 0.0  | 0.084                                      | 98.3                | 639      | 14    |
| M6002       | 23.7  | 0.0  | 0.035                                      | 89.9                | 817      | 15    |
| M6002       | 6.1   | 0.0  | 0.082                                      | 93.4                | 1133     | 17    |
| M6002       | 4.9   | 0.0  | 0.041                                      | 87.3                | 1381     | 19    |
| M6002       | 10.8  | 0.2  | 0.056                                      | 98.9                | 1447     | 19    |
| M6002       | 11.3  | 0.0  | 0.043                                      | 96.4                | 1568     | 20    |
| M6002       | 29.4  | 0.1  | 0.019                                      | 94.9                | 1595     | 21    |
| M6002       | 29.8  | 0.0  | 0.036                                      | 96.2                | 1948     | 23    |
| M6002       | 25.5  | -0.4 | 0.008                                      | 10.4                | 1981     | 24    |
| M6002       | 24.0  | -0.1 | 0.038                                      | 102.4               | 2030     | 24    |
| M6002       | 7.5   | 0.0  | 0.077                                      | 96.5                | 2186     | 25    |
| M6006       | 9.7   | 0.0  | 0.011                                      | 68.3                | 354      | 13    |
| M6006       | 7.3   | 0.1  | 0.003                                      | 15.6                | 373      | 14    |
| M6006       | 15.9  | 0.0  | 0.064                                      | 90.1                | 378      | 14    |
| M6006       | 22.2  | 0.1  | 0.016                                      | 95.0                | 384      | 14    |
| M6006       | 12.9  | 0.0  | 0.079                                      | 98.6                | 384      | 14    |
| M6006       | 7.3   | 0.2  | 0.108                                      | 97.8                | 385      | 14    |
| M6006       | 17.1  | 0.2  | 0.019                                      | 94.6                | 407      | 14    |
| M6006       | 11.6  | 0.1  | 0.054                                      | 95.4                | 421      | 14    |

| sample name | Ca/K | Cl/K | Mol <sup>39</sup> Ar (x10 <sup>-14</sup> ) | % <sup>40</sup> Ar* | Age (Ma) | ± Age |
|-------------|------|------|--------------------------------------------|---------------------|----------|-------|
| M6006       | 5.3  | 0.0  | 0.187                                      | 97.2                | 422      | 14    |
| M6006       | 12.5 | 0.0  | 0.056                                      | 95.0                | 429      | 14    |
| M6006       | 12.0 | 0.0  | 0.081                                      | 95.2                | 434      | 14    |
| M6006       | 18.6 | 0.0  | 0.038                                      | 96.1                | 437      | 14    |
| M6006       | 13.7 | 0.0  | 0.027                                      | 88.9                | 439      | 14    |
| M6006       | 11.2 | 0.1  | 0.044                                      | 91.2                | 455      | 14    |
| M6006       | 17.5 | 0.0  | 0.035                                      | 91.2                | 499      | 14    |
| M6006       | 12.7 | 0.0  | 0.037                                      | 87.8                | 516      | 14    |
| M6006       | 14.0 | 0.0  | 0.041                                      | 96.1                | 533      | 14    |
| M6006       | 48.3 | 0.0  | 0.016                                      | 53.7                | 533      | 14    |
| M6006       | 7.3  | 0.7  | 0.045                                      | 83.4                | 540      | 14    |
| M6006       | 11.0 | 0.0  | 0.029                                      | 86.6                | 561      | 14    |
| M6006       | 1.1  | 0.2  | 0.011                                      | 96.7                | 3780     | 40    |
| M6007       | 9.6  | 0.1  | 0.002                                      | 99.9                | 480      | 10    |
| M6011       | 9.0  | 0.6  | 0.159                                      | 98.4                | 392      | 14    |
| M6011       | 11.5 | 0.3  | 0.034                                      | 93.0                | 400      | 14    |
| M6011       | 5.5  | 0.0  | 0.251                                      | 97.3                | 406      | 14    |
| M6011       | 6.5  | 0.0  | 0.255                                      | 29.8                | 413      | 14    |
| M6011       | 7.7  | 0.2  | 0.060                                      | 94.9                | 414      | 14    |
| M6011       | 6.0  | 0.0  | 0.349                                      | 98.2                | 417      | 14    |
| M6011       | 15.3 | 0.0  | 0.065                                      | 89.2                | 423      | 14    |
| M6011       | 7.2  | 0.0  | 0.239                                      | 92.9                | 455      | 14    |
| M6011       | 11.4 | 0.2  | 0.050                                      | 95.2                | 464      | 14    |
| M6011       | 7.4  | 0.0  | 0.021                                      | 27.7                | 469      | 14    |
| M6011       | 13.6 | 0.0  | 0.074                                      | 73.6                | 473      | 14    |
| M6011       | 8.3  | 0.5  | 0.125                                      | 93.4                | 478      | 14    |
| M6011       | 17.8 | 0.0  | 0.063                                      | 83.9                | 497      | 14    |
| M6011       | 7.9  | 0.1  | 0.033                                      | 87.0                | 533      | 14    |
| M6011       | 9.3  | 0.0  | 0.270                                      | 93.6                | 534      | 14    |
| M6011       | 10.3 | 0.4  | 0.039                                      | 92.1                | 556      | 14    |
| M6011       | 13.3 | 0.1  | 0.029                                      | 92.5                | 557      | 14    |
| M6011       | 9.2  | 0.2  | 0.032                                      | 86.8                | 568      | 14    |
| M6011       | 10.6 | 0.2  | 0.075                                      | 90.2                | 575      | 14    |
| M6011       | 14.3 | 0.0  | 0.132                                      | 95.0                | 813      | 15    |
| M6011       | 6.4  | 0.5  | 0.003                                      | 87.3                | 955      | 16    |
| M6011       | 21.3 | 0.0  | 0.070                                      | 91.7                | 1115     | 17    |
| M6011       | 2.5  | 0.2  | 0.008                                      | 93.9                | 2131     | 25    |
| M6012       | 14.1 | 0.1  | 0.087                                      | 97.0                | 385      | 14    |
| M6012       | 10.1 | 0.1  | 0.078                                      | 98.7                | 386      | 14    |
| M6012       | 17.7 | 0.0  | 0.048                                      | 94.3                | 388      | 14    |
| M6012       | 29.1 | 0.1  | 0.019                                      | 90.0                | 389      | 14    |
| M6012       | 5.4  | 0.2  | 0.253                                      | 97.2                | 389      | 14    |
| M6012       | 5.6  | 0.4  | 0.048                                      | 95.8                | 392      | 14    |
| M6012       | 28.7 | 0.8  | 0.069                                      | 95.7                | 392      | 14    |
| M6012       | 7.0  | 0.0  | 0.174                                      | 97.3                | 395      | 14    |
| M6012       | 18.5 | 0.5  | 0.090                                      | 97.7                | 397      | 14    |

| sample name | Ca/K | Cl/K | Mol <sup>39</sup> Ar (x10 <sup>-14</sup> ) | % <sup>40</sup> Ar* | Age (Ma) | ± Age |
|-------------|------|------|--------------------------------------------|---------------------|----------|-------|
| M6012       | 13.0 | 0.0  | 0.018                                      | 87.3                | 398      | 14    |
| M6012       | 8.3  | 0.1  | 0.113                                      | 98.1                | 399      | 14    |
| M6012       | 22.5 | 0.3  | 0.037                                      | 87.3                | 400      | 14    |
| M6012       | 74.6 | 0.2  | 0.015                                      | 85.0                | 403      | 14    |
| M6012       | 7.9  | 0.4  | 0.103                                      | 98.8                | 407      | 14    |
| M6012       | 8.2  | 0.0  | 0.155                                      | 94.1                | 408      | 14    |
| M6012       | 16.1 | 0.0  | 0.077                                      | 87.1                | 413      | 14    |
| M6012       | 11.9 | 0.2  | 0.013                                      | 81.2                | 419      | 14    |
| M6012       | 23.8 | 0.2  | 0.041                                      | 95.6                | 420      | 14    |
| M6012       | 46.5 | 0.4  | 0.028                                      | 90.2                | 422      | 14    |
| M6012       | 17.6 | 0.5  | 0.040                                      | 92.9                | 423      | 14    |
| M6012       | 8.3  | 0.0  | 0.138                                      | 89.8                | 427      | 14    |
| M6012       | 6.3  | 0.0  | 0.156                                      | 89.8                | 430      | 14    |
| M6012       | 6.7  | 0.2  | 0.098                                      | 96.9                | 431      | 14    |
| M6012       | 7.8  | 1.7  | 0.128                                      | 98.1                | 431      | 14    |
| M6012       | 6.5  | 0.0  | 0.213                                      | 89.7                | 434      | 14    |
| M6012       | 10.7 | 0.4  | 0.075                                      | 92.4                | 446      | 14    |
| M6012       | 0.3  | 0.0  | 0.510                                      | 89.4                | 450      | 14    |
| M6012       | 17.2 | 0.4  | 0.064                                      | 96.0                | 452      | 14    |
| M6012       | 17.7 | 0.6  | 0.048                                      | 69.3                | 489      | 14    |
| M6012       | 80.2 | 0.4  | 0.016                                      | 77.5                | 492      | 14    |
| M6012       | 6.9  | 0.0  | 0.202                                      | 95.2                | 495      | 14    |
| M6012       | 7.1  | 0.3  | 0.031                                      | 95.2                | 502      | 14    |
| M6012       | 31.7 | 1.3  | 0.043                                      | 95.6                | 512      | 14    |
| M6012       | 13.5 | 0.0  | 0.108                                      | 24.0                | 522      | 14    |
| M6012       | 11.2 | 0.8  | 0.105                                      | 95.8                | 532      | 14    |
| M6012       | 7.7  | 0.1  | 0.096                                      | 92.4                | 560      | 14    |
| M6012       | 35.7 | 0.2  | 0.025                                      | 95.4                | 575      | 14    |
| M6012       | 7.3  | 0.0  | 0.172                                      | 97.1                | 684      | 15    |
| M6012       | 6.0  | 1.9  | 0.215                                      | 97.8                | 687      | 15    |
| M6012       | 9.1  | 1.5  | 0.140                                      | 95.0                | 1036     | 17    |
| M6012       | 28.1 | 0.3  | 0.047                                      | 97.9                | 1181     | 18    |
| M6012       | 34.4 | 1.4  | 0.028                                      | 97.2                | 1622     | 21    |
| M6012       | 17.6 | 0.3  | 0.056                                      | 96.2                | 1949     | 23    |
| M6014       | 6.3  | 0.4  | 0.033                                      | 97.5                | 350      | 13    |
| M6014       | 9.9  | 0.3  | 0.114                                      | 93.9                | 350      | 13    |
| M6014       | 7.5  | 0.4  | 0.107                                      | 95.3                | 368      | 14    |
| M6014       | 12.6 | 0.0  | 0.045                                      | 90.5                | 383      | 14    |
| M6014       | 6.2  | 0.5  | 0.049                                      | 91.2                | 383      | 14    |
| M6014       | 5.8  | 0.2  | 0.051                                      | 92.5                | 384      | 14    |
| M6014       | 8.0  | 0.0  | 0.039                                      | 97.7                | 387      | 14    |
| M6014       | 5.9  | 0.1  | 0.145                                      | 98.5                | 388      | 14    |
| M6014       | 26.7 | 0.0  | 0.027                                      | 89.0                | 390      | 14    |
| M6014       | 5.8  | 0.2  | 0.079                                      | 97.8                | 393      | 14    |
| M6014       | 14.1 | 0.0  | 0.039                                      | 91.9                | 395      | 14    |
| M6014       | 10.2 | 0.0  | 0.093                                      | 91.3                | 397      | 14    |

| sample name | Ca/K | Cl/K | Mol <sup>39</sup> Ar (x10 <sup>-14</sup> ) | % <sup>40</sup> Ar* | Age (Ma) | ± Age |
|-------------|------|------|--------------------------------------------|---------------------|----------|-------|
| M6014       | 8.5  | 0.2  | 0.110                                      | 96.9                | 402      | 14    |
| M6014       | 30.0 | -0.1 | 0.006                                      | 46.8                | 409      | 14    |
| M6014       | 8.4  | 0.0  | 0.008                                      | 40.3                | 409      | 14    |
| M6014       | 6.0  | 0.2  | 0.056                                      | 96.3                | 410      | 14    |
| M6014       | 14.0 | 0.2  | 0.126                                      | 98.6                | 420      | 14    |
| M6014       | 9.3  | 0.8  | 0.054                                      | 93.6                | 426      | 14    |
| M6014       | 6.6  | 0.2  | 0.191                                      | 98.5                | 437      | 14    |
| M6014       | 7.8  | 1.1  | 0.161                                      | 95.9                | 453      | 14    |
| M6014       | 15.4 | 0.6  | 0.098                                      | 96.2                | 455      | 14    |
| M6014       | 19.6 | 0.1  | 0.034                                      | 90.3                | 458      | 14    |
| M6014       | 5.2  | 0.0  | 0.218                                      | 94.0                | 461      | 14    |
| M6014       | 6.7  | 0.1  | 0.290                                      | 97.2                | 472      | 14    |
| M6014       | 16.8 | 0.0  | 0.054                                      | 97.4                | 482      | 14    |
| M6014       | 5.4  | 0.2  | 0.142                                      | 96.5                | 491      | 14    |
| M6014       | 5.7  | 0.0  | 0.210                                      | 97.7                | 514      | 14    |
| M6014       | 10.7 | 0.2  | 0.069                                      | 97.7                | 557      | 14    |
| M6014       | 10.3 | 0.0  | 0.056                                      | 89.0                | 566      | 14    |
| M6014       | 9.1  | 0.3  | 0.079                                      | 93.6                | 594      | 14    |
| M6014       | 32.6 | 0.3  | 0.050                                      | 90.8                | 626      | 14    |
| M6014       | 15.5 | 0.2  | 0.124                                      | 94.2                | 631      | 14    |
| M6014       | 4.0  | 0.0  | 0.167                                      | 98.0                | 642      | 14    |
| M6014       | 9.0  | 0.2  | 0.028                                      | 94.4                | 740      | 15    |
| M6014       | 6.7  | 0.4  | 0.053                                      | 96.0                | 773      | 15    |
| M6014       | 8.3  | 0.0  | 0.113                                      | 99.5                | 904      | 16    |
| M6014       | 0.5  | 0.0  | 0.011                                      | 91.2                | 1038     | 17    |
| M6014       | 10.9 | 0.2  | 0.061                                      | 97.4                | 1153     | 17    |
| M6014       | 0.2  | 0.1  | 0.041                                      | 96.8                | 1257     | 18    |
| M6014       | 36.1 | 0.0  | 0.044                                      | 99.2                | 3710     | 39    |
| M6016       | 12.3 | 0.0  | 0.155                                      | 94.9                | 399      | 14    |
| M6016       | 8.3  | 0.0  | 0.274                                      | 93.5                | 402      | 14    |
| M6016       | 10.9 | 0.0  | 0.149                                      | 92.8                | 408      | 14    |
| M6016       | 7.6  | 0.0  | 0.320                                      | 96.1                | 441      | 14    |
| M6016       | 10.8 | 0.0  | 0.172                                      | 91.0                | 449      | 14    |
| M6016       | 13.8 | 0.0  | 0.196                                      | 95.7                | 520      | 14    |
| M6016       | 19.0 | 0.0  | 0.057                                      | 90.2                | 588      | 14    |
| M6016       | 34.1 | 0.0  | 0.061                                      | 92.7                | 1034     | 17    |
| M6016       | 30.7 | 0.0  | 0.117                                      | 98.3                | 2286     | 26    |
| M6018       | 6.4  | 0.0  | 0.063                                      | 96.7                | 409      | 14    |
| M6018       | 5.0  | 0.1  | 0.024                                      | 93.3                | 410      | 14    |
| M6018       | 4.6  | 0.1  | 0.036                                      | 95.1                | 448      | 14    |
| M6018       | 15.3 | 0.0  | 0.009                                      | 39.7                | 516      | 14    |
| M6018       | 5.7  | 0.0  | 0.051                                      | 92.1                | 532      | 14    |
| M6018       | 10.4 | 0.0  | 0.024                                      | 85.3                | 617      | 14    |
| M6018       | 11.4 | 0.0  | 0.023                                      | 98.6                | 916      | 16    |
| SW5212      | 9.2  | 0.3  | 0.001                                      | 80.6                | 387      | 8     |
| SW5212      | 4.9  | 0.0  | 0.002                                      | 98.8                | 410      | 8     |

| sample name | Ca/K | Cl/K | Mol <sup>39</sup> Ar (x10 <sup>-14</sup> ) | % <sup>40</sup> Ar* | Age (Ma) | ± Age |
|-------------|------|------|--------------------------------------------|---------------------|----------|-------|
| SW5212      | 10.3 | 0.0  | 0.001                                      | 96.8                | 417      | 8     |
| SW5212      | 12.8 | 0.0  | 0.001                                      | 91.5                | 431      | 9     |
| SW5212      | 3.6  | 0.0  | 0.001                                      | 95.8                | 465      | 9     |
| SW5212      | 10.2 | 0.0  | 0.001                                      | 91.0                | 503      | 10    |
| SW5212      | 5.3  | 0.0  | 0.001                                      | 98.2                | 506      | 10    |
| SW5212      | 4.7  | 0.0  | 0.001                                      | 99.4                | 721      | 14    |
| SW5212      | 3.8  | 0.0  | 0.002                                      | 96.2                | 783      | 16    |
| SW5212      | 9.1  | 0.0  | 0.001                                      | 98.6                | 1079     | 22    |
| SW5212      | 0.8  | 0.1  | 0.002                                      | 98.9                | 1220     | 24    |
| SW5212      | 29.9 | -0.1 | 0.001                                      | 101.6               | 1432     | 29    |
| SW5212      | 23.9 | 0.0  | 0.001                                      | 98.3                | 2327     | 47    |
| SW5241      | 6.2  | 0.0  | 0.003                                      | 102.0               | 433      | 9     |
| SW5241      | 5.1  | 0.0  | 0.002                                      | 95.4                | 435      | 9     |
| SW5241      | 4.7  | 0.0  | 0.002                                      | 98.6                | 439      | 9     |
| SW5241      | 4.6  | 0.0  | 0.004                                      | 100.3               | 472      | 9     |
| SW5241      | 5.3  | 0.0  | 0.002                                      | 42.8                | 503      | 10    |
| SW5241      | 3.2  | 0.0  | 0.002                                      | 100.0               | 1705     | 34    |
| SW5250      | 0.0  | 0.0  | 0.008                                      | 44.5                | 13       | 0     |
| SW5250      | 7.1  | 0.0  | 0.002                                      | 66.2                | 60       | 1     |
| SW5250      | 0.2  | 0.0  | 0.022                                      | 54.3                | 172      | 3     |
| SW5250      | 2.7  | 0.1  | 0.001                                      | 98.0                | 226      | 5     |
| SW5250      | 2.9  | 0.1  | 0.003                                      | 84.3                | 273      | 5     |
| SW5250      | 3.6  | 0.1  | 0.004                                      | 100.2               | 314      | 6     |
| SW5250      | 2.7  | 0.0  | 0.001                                      | 86.7                | 331      | 7     |
| SW5250      | 1.7  | -0.1 | 0.001                                      | 87.5                | 345      | 7     |
| SW5250      | 4.9  | 0.0  | 0.001                                      | 84.5                | 362      | 7     |
| SW5250      | 7.0  | 0.0  | 0.001                                      | 85.2                | 370      | 7     |
| SW5250      | 4.9  | 0.1  | 0.003                                      | 97.8                | 371      | 7     |
| SW5250      | 4.4  | 0.0  | 0.002                                      | 99.7                | 388      | 8     |
| SW5250      | 4.3  | 0.0  | 0.002                                      | 101.4               | 392      | 8     |
| SW5250      | 4.4  | 0.0  | 0.002                                      | 97.2                | 395      | 8     |
| SW5250      | 4.8  | 0.0  | 0.003                                      | 87.6                | 400      | 8     |
| SW5250      | 8.2  | 0.0  | 0.002                                      | 79.0                | 402      | 8     |
| SW5250      | 8.2  | 0.0  | 0.002                                      | 97.0                | 402      | 8     |
| SW5250      | 6.7  | 0.0  | 0.002                                      | 95.0                | 405      | 8     |
| SW5250      | -0.4 | 0.0  | 0.010                                      | 97.0                | 407      | 8     |
| SW5250      | 14.8 | 0.1  | 0.001                                      | 96.3                | 408      | 8     |
| SW5250      | 6.1  | 0.0  | 0.003                                      | 96.5                | 414      | 8     |
| SW5250      | 5.0  | 0.0  | 0.002                                      | 94.4                | 418      | 8     |
| SW5250      | 5.3  | 0.0  | 0.001                                      | 95.4                | 418      | 8     |
| SW5250      | 5.6  | 0.0  | 0.001                                      | 91.3                | 420      | 8     |
| SW5250      | 12.4 | 0.0  | 0.001                                      | 97.3                | 421      | 8     |
| SW5250      | 7.5  | 0.0  | 0.002                                      | 96.8                | 435      | 9     |
| SW5250      | 4.8  | 0.0  | 0.001                                      | 92.0                | 482      | 10    |
